# Supplementary material for: The Catalytic Architecture of Leukotriene C4 Synthase with Two Arginine Residues
Source: PubMed Central journal article supplement — J Biol Chem. 2011 Mar 16;286(18):16392–401. doi: 10.1074/jbc.M110.150177 (PMC3091245; doi:10.1074/jbc.m110.150177), 2011-03-16
Supplement: supp_M110.150177_jbc.M110.150177-1.pdf [file supp_M110.150177_jbc.M110.150177-1.pdf]

Table S1

*Nucleotide sequences of primers.*

| Mutant |            | Primer sequence                                          |
|--------|------------|----------------------------------------------------------|
| R31A   | sense      | 5'-GTGATCTCGGCGCGC <sub>gcc</sub> GCCTTCCGCGTGTCG-3'     |
|        | anti-sense | 5'-CGACACGCGGAAGGC <sub>ggc</sub> GCGCGCCGAGATCAC-3'     |
| R31E   | sense      | 5'-GATCTCGGCGCGC <sub>gag</sub> GCCTTCCGCGTG-3'          |
|        | anti-sense | 5'-CACGCGGAAGGC <sub>ctc</sub> GCGCGCCGAGATC-3'          |
| R31L   | sense      | 5'-GTGATCTCGGCGCGC <sub>cta</sub> GCCTTCCGCGTGTCG-3'     |
|        | anti-sense | 5'-CGACACGCGGAAGGC <sub>tag</sub> GCGCGCCGAGATCAC-3'     |
| R31Q   | sense      | 5'-GATCTCGGCGCGC <sub>cag</sub> GCCTTCCGCGTG-3'          |
|        | anti-sense | 5'-CACGCGGAAGGC <sub>ctg</sub> GCGCGCCGAGATC-3'          |
| R90A   | sense      | 5'-TGGTCTACCTGTTTCGCG <sub>gcc</sub> CTCCGCTACTTCCAGG-3' |
|        | anti-sense | 5'-GGAAGTAGCGGAG <sub>ggc</sub> CGCGAACAGGTAGA-3'        |
| R90Q   | sense      | 5'-TCTACCTGTTTCGCG <sub>cag</sub> CTCCGCTACTTCCAG-3'     |
|        | anti-sense | 5'-CTGGAAGTAGCGGAG <sub>ctg</sub> CGCGAACAGGTAGA-3'      |
| R92A   | sense      | 5'-GTTTCGCGCGCCTC <sub>gcc</sub> TACTTCCAGGGC-3'         |
|        | anti-sense | 5'-GCCCTGGAAGTA <sub>ggc</sub> GAGGCGCGCGAAC-3'          |
| R92Q   | sense      | 5'-ACCTGTTTCGCGCGCCTC <sub>cag</sub> TACTTCCAGGGCTACG-3' |
|        | anti-sense | 5'-CGTAGCCCTGGAAGTA <sub>ctg</sub> GAGGCGCGCGAACAGGT-3'  |
| R99A   | sense      | 5'-CAGGGCTACGCG <sub>gcc</sub> TCCGCGCAGCT-3'            |
|        | anti-sense | 5'-AGCTGCGCGGA <sub>ggc</sub> CGCGTAGCCCTG-3'            |
| R99Q   | sense      | 5'-CAGGGCTACGCG <sub>cag</sub> TCCGCGCAGCTCA-3'          |
|        | anti-sense | 5'-TGAGCTGCGCGGA <sub>ctg</sub> CGCGTAGCCCTG-3'          |
| R104A  | sense      | 5'-CGCTCCGCGCAGCTC <sub>gca</sub> CTGGCACCGCTGTAC-3'     |
|        | anti-sense | 5'-GTACAGCGGTGCCAG <sub>tgc</sub> GAGCTGCGCGGAGCG-3'     |
| R104Q  | sense      | 5'-CTCCGCGCAGCTC <sub>cag</sub> CTGGCACCGCTG-3'          |
|        | anti-sense | 5'-CAGCGGTGCCAG <sub>ctg</sub> GAGCTGCGCGGAG-3'          |
| R113A  | sense      | 5'-ACGCGAGCGCG <sub>gcc</sub> GCCCTCTGGC-3'              |
|        | anti-sense | 5'-GCCAGAGGGC <sub>ggc</sub> GCGCTCGCGT-3'               |
| R113Q  | sense      | 5'-ACGCGAGCGCG <sub>cag</sub> GCCCTCTGGCTG-3'            |
|        | anti-sense | 5'-CAGCCAGAGGGC <sub>ctg</sub> GCGCTCGCGT-3'             |
